# Supplementary material for: Dissecting the Gene Network of Dietary Restriction to Identify Evolutionarily Conserved Pathways and New Functional Genes
Source: PLoS Genet. 2012 Aug 9;8(8):e1002834. doi: 10.1371/journal.pgen.1002834 (PMC3415404; doi:10.1371/journal.pgen.1002834)
Supplement: Table S21 — Clusters of functional enrichment for nuclear protein kinases in yeast. Clusters of functional enriched terms of yeast genes which encode protein kinases and are localized in the nucleus according to Gene Ontology are listed. (XLS) [file pgen.1002834.s025.xls]

## Sheet: S21
Table S21: Clusters of functional enrichment for nuclear protein kinases in yeast. Clusters of functional enriched terms of yeast genes which encode protein kinases and are localized in the nucleus according to Gene Ontology are listed.
Annotation Cluster 1		Enrichment Score: 23.76			Count	p-value	Benjamini
	GOTERM_MF_FAT	protein serine/threonine kinase activity	RT		31	8.5e-39	4.9e-37
	SP_PIR_KEYWORDS	serine/threonine-protein kinase	RT		28	1.1e-38	6.3e-37
	GOTERM_MF_FAT	protein kinase activity	RT		31	3.9e-38	1.1e-36
	GOTERM_BP_FAT	protein amino acid phosphorylation	RT		30	1.1e-37	4.5e-35
	UP_SEQ_FEATURE	domain:Protein kinase	RT		27	8.6e-37	8.6e-35
	SP_PIR_KEYWORDS	kinase	RT		29	4.6e-34	1.3e-32
	UP_SEQ_FEATURE	binding site:ATP	RT		27	3.3e-33	1.6e-31
	INTERPRO	Protein kinase, core	RT		26	2.5e-32	1.2e-30
	GOTERM_BP_FAT	phosphorylation	RT		30	6.4e-32	1.3e-29
	INTERPRO	Serine/threonine protein kinase-related	RT		25	7e-31	1.7e-29
	INTERPRO	Serine/threonine protein kinase, active site	RT		25	8.9e-31	1.4e-29
	UP_SEQ_FEATURE	active site:Proton acceptor	RT		27	9.2e-31	3e-29
	INTERPRO	Protein kinase, ATP binding site	RT		24	7.2e-29	8.6e-28
	GOTERM_BP_FAT	phosphate metabolic process	RT		30	5.1e-28	7.1e-26
	GOTERM_BP_FAT	phosphorus metabolic process	RT		30	8.6e-28	9e-26
	INTERPRO	Serine/threonine protein kinase	RT		18	1.3e-21	1.2e-20
	UP_SEQ_FEATURE	nucleotide phosphate-binding region:ATP	RT		25	6e-20	1.5e-18
	SP_PIR_KEYWORDS	atp-binding	RT		29	6.1e-20	8.9e-19
	SP_PIR_KEYWORDS	transferase	RT		29	7e-20	8.1e-19
	SP_PIR_KEYWORDS	nucleotide-binding	RT		30	1.5e-19	1.4e-18
	SMART	S_TKc	RT		18	7e-17	1.7e-15
	GOTERM_MF_FAT	adenyl ribonucleotide binding	RT		30	9.9e-16	1.9e-14
	GOTERM_MF_FAT	adenyl nucleotide binding	RT		30	4.8e-15	7.1e-14
	GOTERM_MF_FAT	purine nucleoside binding	RT		30	5.4e-15	6.3e-14
	GOTERM_MF_FAT	nucleoside binding	RT		30	6.6e-15	6.4e-14
	GOTERM_MF_FAT	ATP binding	RT		29	1.2e-14	9.8e-14
	GOTERM_MF_FAT	purine ribonucleotide binding	RT		30	3.8e-14	2.7e-13
	GOTERM_MF_FAT	ribonucleotide binding	RT		30	3.8e-14	2.7e-13
	GOTERM_MF_FAT	purine nucleotide binding	RT		30	1.6e-13	1e-12
	SP_PIR_KEYWORDS	ATP	RT		17	2.7e-13	2.2e-12
	GOTERM_MF_FAT	nucleotide binding	RT		30	5.2e-12	2.8e-11
Annotation Cluster 2		Enrichment Score: 13.22			Count	p-value	Benjamini
	SP_PIR_KEYWORDS	phosphotransferase	RT		18	4e-21	7.6e-20
	SP_PIR_KEYWORDS	ATP	RT		17	2.7e-13	2.2e-12
	SP_PIR_KEYWORDS	serine/threonine-specific protein kinase	RT		10	2.7e-11	2e-10
	KEGG_PATHWAY	Meiosis	RT		13	4.7e-10	1.9e-09
Annotation Cluster 3		Enrichment Score: 6.46			Count	p-value	Benjamini
	GOTERM_BP_FAT	cell cycle	RT		22	1.8e-09	1.2e-07
	GOTERM_BP_FAT	meiosis	RT		12	1.5e-07	8.9e-06
	GOTERM_BP_FAT	M phase of meiotic cell cycle	RT		12	1.5e-07	8.9e-06
	GOTERM_BP_FAT	meiotic cell cycle	RT		12	2.1e-07	1.1e-05
	GOTERM_BP_FAT	cell cycle phase	RT		16	4.8e-07	2.3e-05
	GOTERM_BP_FAT	M phase	RT		14	1.3e-06	5.1e-05
	SP_PIR_KEYWORDS	meiosis	RT		8	4.3e-06	1.9e-05
	GOTERM_BP_FAT	cell cycle process	RT		16	8.8e-06	0.00031
Annotation Cluster 4		Enrichment Score: 4.99			Count	p-value	Benjamini
	UP_SEQ_FEATURE	domain:AGC-kinase C-terminal	RT		6	8.8e-09	1.7e-07
	INTERPRO	AGC-kinase, C-terminal	RT		6	3.3e-08	2.7e-07
	SP_PIR_KEYWORDS	camp	RT		5	8.7e-08	5.6e-07
	PIR_SUPERFAMILY	PIRSF000564:kinase-related transforming protein	RT		5	4e-07	5.6e-06
	SP_PIR_KEYWORDS	cAMP binding	RT		4	8.8e-07	4.6e-06
	GOTERM_CC_FAT	cAMP-dependent protein kinase complex	RT		4	1e-06	4.5e-05
	SMART	S_TK_X	RT		6	1.4e-06	1.1e-05
	GOTERM_MF_FAT	cyclic nucleotide-dependent protein kinase activity	RT		4	3.2e-06	1.3e-05
	GOTERM_MF_FAT	cAMP-dependent protein kinase activity	RT		4	3.2e-06	1.3e-05
	GOTERM_BP_FAT	aging	RT		7	2.6e-05	0.00077
	GOTERM_BP_FAT	intracellular signaling cascade	RT		8	0.00042	0.0093
	SP_PIR_KEYWORDS	heterotetramer	RT		3	0.0024	0.0081
	GOTERM_BP_FAT	Ras protein signal transduction	RT		4	0.0028	0.032
	SP_PIR_KEYWORDS	magnesium	RT		6	0.0047	0.015
	GOTERM_BP_FAT	small GTPase mediated signal transduction	RT		4	0.029	0.18
Annotation Cluster 5		Enrichment Score: 4.94			Count	p-value	Benjamini
	SP_PIR_KEYWORDS	cell cycle	RT		12	1.4e-06	6.8e-06
	SP_PIR_KEYWORDS	cell division	RT		9	1.5e-05	5.8e-05
	GOTERM_BP_FAT	cell division	RT		12	7.2e-05	0.0019
Annotation Cluster 6		Enrichment Score: 4.52			Count	p-value	Benjamini
	GOTERM_MF_FAT	kinase regulator activity	RT		12	4.9e-13	2.9e-12
	GOTERM_MF_FAT	protein kinase regulator activity	RT		11	7.6e-12	3.7e-11
	GOTERM_MF_FAT	cyclin-dependent protein kinase regulator activity	RT		9	8.9e-11	4e-10
	GOTERM_CC_FAT	cyclin-dependent protein kinase holoenzyme complex	RT		6	4.9e-08	4.4e-06
	SP_PIR_KEYWORDS	cyclin	RT		6	1.7e-07	1e-06
	INTERPRO	Cyclin, N-terminal	RT		6	6.4e-07	4.4e-06
	INTERPRO	Cyclin-related 2	RT		4	9.7e-06	5.8e-05
	GOTERM_BP_FAT	energy reserve metabolic process	RT		5	0.00035	0.0086
	GOTERM_BP_FAT	regulation of carbohydrate biosynthetic process	RT		4	0.001	0.02
	GOTERM_BP_FAT	regulation of cellular carbohydrate metabolic process	RT		4	0.002	0.028
	GOTERM_BP_FAT	regulation of carbohydrate metabolic process	RT		4	0.0035	0.037
	GOTERM_BP_FAT	regulation of generation of precursor metabolites and energy	RT		3	0.0065	0.06
	INTERPRO	Cyclin	RT		3	0.0091	0.047
	GOTERM_BP_FAT	regulation of glucose metabolic process	RT		3	0.022	0.15
	SP_PIR_KEYWORDS	carbohydrate metabolism	RT		3	0.022	0.059
	SMART	CYCLIN	RT		3	0.039	0.18
	GOTERM_BP_FAT	energy derivation by oxidation of organic compounds	RT		5	0.057	0.3
	GOTERM_BP_FAT	generation of precursor metabolites and energy	RT		5	0.17	0.63
Annotation Cluster 7		Enrichment Score: 4.24			Count	p-value	Benjamini
	GOTERM_BP_FAT	regulation of cell cycle process	RT		9	1.1e-06	4.5e-05
	SP_PIR_KEYWORDS	meiosis	RT		8	4.3e-06	1.9e-05
	GOTERM_BP_FAT	regulation of meiosis	RT		4	0.0015	0.024
	GOTERM_BP_FAT	regulation of meiotic cell cycle	RT		4	0.0016	0.026
Annotation Cluster 8		Enrichment Score: 4.04			Count	p-value	Benjamini
	GOTERM_BP_FAT	regulation of cell cycle process	RT		9	1.1e-06	4.5e-05
	GOTERM_BP_FAT	regulation of mitotic cell cycle	RT		6	0.00055	0.011
	GOTERM_BP_FAT	regulation of exit from mitosis	RT		4	0.0013	0.023
Annotation Cluster 9		Enrichment Score: 3.49			Count	p-value	Benjamini
	GOTERM_BP_FAT	regulation of phosphorylation	RT		6	2e-05	0.00064
	GOTERM_BP_FAT	regulation of phosphate metabolic process	RT		6	3.8e-05	0.0011
	GOTERM_BP_FAT	regulation of phosphorus metabolic process	RT		6	3.8e-05	0.0011
	GOTERM_BP_FAT	regulation of cyclin-dependent protein kinase activity	RT		4	0.00053	0.011
	GOTERM_BP_FAT	regulation of protein kinase activity	RT		4	0.0026	0.03
	GOTERM_BP_FAT	regulation of kinase activity	RT		4	0.0028	0.032
	GOTERM_BP_FAT	regulation of transferase activity	RT		4	0.0033	0.035
Annotation Cluster 10		Enrichment Score: 1.86			Count	p-value	Benjamini
	GOTERM_MF_FAT	cyclin-dependent protein kinase activity	RT		4	6.5e-05	0.00025
	GOTERM_BP_FAT	phosphorylation of RNA polymerase II C-terminal domain	RT		3	0.00039	0.0091
	GOTERM_BP_FAT	regulation of transcription from RNA polymerase II promoter	RT		9	0.0011	0.02
	GOTERM_BP_FAT	regulation of transcription, DNA-dependent	RT		11	0.0033	0.036
	GOTERM_BP_FAT	regulation of RNA metabolic process	RT		11	0.0038	0.038
	GOTERM_BP_FAT	positive regulation of transcription from RNA polymerase I promoter	RT		3	0.0041	0.04
	GOTERM_BP_FAT	positive regulation of macromolecule metabolic process	RT		7	0.007	0.064
	GOTERM_BP_FAT	regulation of transcription from RNA polymerase I promoter	RT		3	0.0093	0.081
	GOTERM_BP_FAT	regulation of transcription	RT		12	0.014	0.11
	GOTERM_BP_FAT	positive regulation of cellular biosynthetic process	RT		6	0.022	0.15
	GOTERM_BP_FAT	positive regulation of biosynthetic process	RT		6	0.022	0.15
	GOTERM_BP_FAT	positive regulation of transcription, DNA-dependent	RT		5	0.024	0.16
	GOTERM_BP_FAT	positive regulation of RNA metabolic process	RT		5	0.027	0.17
	GOTERM_BP_FAT	positive regulation of transcription	RT		5	0.051	0.28
	GOTERM_BP_FAT	positive regulation of gene expression	RT		5	0.052	0.28
	GOTERM_BP_FAT	positive regulation of nucleobase, nucleoside, nucleotide and nucleic acid metabolic process	RT		5	0.061	0.31
	GOTERM_BP_FAT	positive regulation of nitrogen compound metabolic process	RT		5	0.061	0.31
	GOTERM_BP_FAT	positive regulation of macromolecule biosynthetic process	RT		5	0.073	0.35
	GOTERM_BP_FAT	transcription	RT		9	0.081	0.38
	SP_PIR_KEYWORDS	Transcription	RT		7	0.095	0.22
	SP_PIR_KEYWORDS	transcription regulation	RT		5	0.34	0.61
Annotation Cluster 11		Enrichment Score: 1.7			Count	p-value	Benjamini
	GOTERM_BP_FAT	mitotic cell cycle	RT		9	0.0031	0.034
	SP_PIR_KEYWORDS	mitosis	RT		5	0.0068	0.021
	GOTERM_BP_FAT	interphase of mitotic cell cycle	RT		5	0.01	0.088
	GOTERM_BP_FAT	interphase	RT		5	0.012	0.1
	GOTERM_BP_FAT	mitosis	RT		6	0.014	0.11
	GOTERM_BP_FAT	M phase of mitotic cell cycle	RT		6	0.014	0.11
	GOTERM_BP_FAT	nuclear division	RT		6	0.017	0.13
	GOTERM_BP_FAT	organelle fission	RT		6	0.02	0.15
	GOTERM_BP_FAT	regulation of organelle organization	RT		4	0.039	0.22
	GOTERM_CC_FAT	cellular bud neck	RT		4	0.074	0.68
	GOTERM_BP_FAT	chromosome segregation	RT		3	0.4	0.9
Annotation Cluster 12		Enrichment Score: 1.61			Count	p-value	Benjamini
	GOTERM_BP_FAT	negative regulation of macromolecule biosynthetic process	RT		8	0.0018	0.027
	GOTERM_BP_FAT	negative regulation of cellular biosynthetic process	RT		8	0.0024	0.031
	GOTERM_BP_FAT	negative regulation of biosynthetic process	RT		8	0.0025	0.031
	GOTERM_BP_FAT	negative regulation of macromolecule metabolic process	RT		8	0.005	0.047
	GOTERM_BP_FAT	negative regulation of transcription from RNA polymerase II promoter	RT		4	0.024	0.16
	GOTERM_BP_FAT	negative regulation of nucleobase, nucleoside, nucleotide and nucleic acid metabolic process	RT		6	0.033	0.2
	GOTERM_BP_FAT	negative regulation of nitrogen compound metabolic process	RT		6	0.033	0.2
	GOTERM_BP_FAT	negative regulation of transcription, DNA-dependent	RT		4	0.17	0.62
	GOTERM_BP_FAT	negative regulation of RNA metabolic process	RT		4	0.17	0.63
	GOTERM_BP_FAT	negative regulation of transcription	RT		4	0.22	0.71
	GOTERM_BP_FAT	negative regulation of gene expression	RT		4	0.22	0.72
Annotation Cluster 13		Enrichment Score: 1.16			Count	p-value	Benjamini
	UP_SEQ_FEATURE	compositionally biased region:Poly-Gln	RT		5	0.0025	0.035
	GOTERM_BP_FAT	external encapsulating structure organization	RT		5	0.15	0.58
	GOTERM_BP_FAT	cell wall organization	RT		5	0.15	0.58
	GOTERM_BP_FAT	sexual reproduction	RT		4	0.4	0.9
Annotation Cluster 14		Enrichment Score: 1.09			Count	p-value	Benjamini
	GOTERM_MF_FAT	cyclin-dependent protein kinase activity	RT		4	6.5e-05	0.00025
	GOTERM_MF_FAT	RNA polymerase II carboxy-terminal domain kinase activity	RT		3	0.00053	0.0019
	GOTERM_BP_FAT	positive regulation of cellular protein metabolic process	RT		4	0.0022	0.03
	GOTERM_BP_FAT	positive regulation of protein metabolic process	RT		4	0.0024	0.032
	GOTERM_BP_FAT	positive regulation of macromolecule metabolic process	RT		7	0.007	0.064
	GOTERM_CC_FAT	nucleoplasm	RT		7	0.013	0.33
	GOTERM_BP_FAT	regulation of cellular protein metabolic process	RT		6	0.023	0.16
	GOTERM_BP_FAT	response to DNA damage stimulus	RT		7	0.029	0.18
	GOTERM_BP_FAT	cellular response to stress	RT		10	0.035	0.21
	SP_PIR_KEYWORDS	DNA damage	RT		4	0.078	0.19
	GOTERM_BP_FAT	transcription	RT		9	0.081	0.38
	SP_PIR_KEYWORDS	Transcription	RT		7	0.095	0.22
	GOTERM_CC_FAT	transcription factor complex	RT		3	0.095	0.72
	GOTERM_CC_FAT	nuclear lumen	RT		7	0.14	0.81
	GOTERM_MF_FAT	general RNA polymerase II transcription factor activity	RT		3	0.15	0.39
	GOTERM_CC_FAT	nucleoplasm part	RT		4	0.27	0.88
	GOTERM_CC_FAT	membrane-enclosed lumen	RT		8	0.29	0.89
	GOTERM_BP_FAT	transcription, DNA-dependent	RT		4	0.29	0.81
	GOTERM_BP_FAT	RNA biosynthetic process	RT		4	0.29	0.81
	SP_PIR_KEYWORDS	transcription regulation	RT		5	0.34	0.61
	GOTERM_CC_FAT	organelle lumen	RT		7	0.41	0.95
	GOTERM_CC_FAT	intracellular organelle lumen	RT		7	0.41	0.95
	GOTERM_BP_FAT	transcription from RNA polymerase II promoter	RT		3	0.41	0.9
	GOTERM_MF_FAT	RNA polymerase II transcription factor activity	RT		3	0.42	0.78
	GOTERM_CC_FAT	chromosome	RT		4	0.45	0.96
	GOTERM_MF_FAT	transcription regulator activity	RT		5	0.46	0.81
	GOTERM_CC_FAT	nucleolus	RT		3	0.53	0.98
	GOTERM_CC_FAT	chromosomal part	RT		3	0.65	0.99
	GOTERM_CC_FAT	non-membrane-bounded organelle	RT		6	0.89	1
	GOTERM_CC_FAT	intracellular non-membrane-bounded organelle	RT		6	0.89	1
Annotation Cluster 15		Enrichment Score: 1.04			Count	p-value	Benjamini
	GOTERM_CC_FAT	cellular bud	RT		5	0.036	0.56
	GOTERM_CC_FAT	site of polarized growth	RT		5	0.064	0.7
	GOTERM_CC_FAT	cellular bud neck	RT		4	0.074	0.68
	GOTERM_BP_FAT	sexual reproduction	RT		4	0.4	0.9
Annotation Cluster 16		Enrichment Score: 0.53			Count	p-value	Benjamini
	GOTERM_CC_FAT	vacuole	RT		4	0.2	0.84
	GOTERM_CC_FAT	fungal-type vacuole	RT		3	0.33	0.91
	GOTERM_CC_FAT	lytic vacuole	RT		3	0.33	0.91
	GOTERM_CC_FAT	storage vacuole	RT		3	0.33	0.91
Annotation Cluster 17		Enrichment Score: 0.53			Count	p-value	Benjamini
	GOTERM_CC_FAT	vacuolar membrane	RT		3	0.19	0.86
	GOTERM_CC_FAT	vacuole	RT		4	0.2	0.84
	GOTERM_CC_FAT	vacuolar part	RT		3	0.21	0.83
	GOTERM_CC_FAT	organelle membrane	RT		3	0.96	1
Annotation Cluster 18		Enrichment Score: 0.51			Count	p-value	Benjamini
	GOTERM_BP_FAT	DNA-dependent DNA replication	RT		3	0.16	0.61
	GOTERM_BP_FAT	DNA replication	RT		3	0.34	0.86
	GOTERM_BP_FAT	DNA metabolic process	RT		5	0.53	0.96
Annotation Cluster 19		Enrichment Score: 0.42			Count	p-value	Benjamini
	GOTERM_BP_FAT	vacuolar protein catabolic process	RT		4	0.07	0.35
	GOTERM_BP_FAT	cellular macromolecule catabolic process	RT		5	0.56	0.97
	GOTERM_BP_FAT	cellular protein catabolic process	RT		4	0.56	0.97
	GOTERM_BP_FAT	protein catabolic process	RT		4	0.58	0.97
	GOTERM_BP_FAT	macromolecule catabolic process	RT		5	0.59	0.97
Annotation Cluster 20		Enrichment Score: 0.36			Count	p-value	Benjamini
	GOTERM_BP_FAT	mRNA metabolic process	RT		4	0.38	0.89
	GOTERM_BP_FAT	RNA processing	RT		6	0.42	0.91
	GOTERM_BP_FAT	mRNA processing	RT		3	0.5	0.95
Annotation Cluster 21		Enrichment Score: 0.2			Count	p-value	Benjamini
	GOTERM_BP_FAT	RNA processing	RT		6	0.42	0.91
	GOTERM_BP_FAT	ribosome biogenesis	RT		4	0.56	0.97
	GOTERM_BP_FAT	ribonucleoprotein complex biogenesis	RT		4	0.64	0.98
	GOTERM_BP_FAT	ncRNA processing	RT		3	0.77	1
	GOTERM_BP_FAT	ncRNA metabolic process	RT		3	0.85	1
