# Supplementary material for: Dissecting the Gene Network of Dietary Restriction to Identify Evolutionarily Conserved Pathways and New Functional Genes
Source: PLoS Genet. 2012 Aug 9;8(8):e1002834. doi: 10.1371/journal.pgen.1002834 (PMC3415404; doi:10.1371/journal.pgen.1002834)
Supplement: Table S24 — Fly DR-induced nuclear protein kinases functional enrichment. Clusters of functional enrichment of DR-induced protein kinases in the fruit fly are listed. (XLS) [file pgen.1002834.s028.xls]

## Sheet: S24
Table S24: Fly DR-induced nuclear protein kinases functional enrichment. Clusters of functional enrichment of DR-induced protein kinases in the fruit fly are listed.
Annotation Cluster 1		Enrichment Score: 4.19			Count	p-value	Benjamini
	GOTERM_MF_FAT	protein kinase regulator activity	RT		4	3.3e-05	0.00035
	GOTERM_MF_FAT	kinase regulator activity	RT		4	3.7e-05	0.00029
	GOTERM_MF_FAT	cyclin-dependent protein kinase regulator activity	RT		3	0.00022	0.0014
Annotation Cluster 2		Enrichment Score: 3.79			Count	p-value	Benjamini
	GOTERM_BP_FAT	G1/S transition of mitotic cell cycle	RT		4	2.9e-07	7.5e-05
	GOTERM_BP_FAT	interphase	RT		4	2.3e-06	0.0003
	GOTERM_BP_FAT	interphase of mitotic cell cycle	RT		4	2.3e-06	0.0003
	INTERPRO	Serine/threonine protein kinase	RT		5	2.8e-06	8.3e-05
	SP_PIR_KEYWORDS	serine/threonine-protein kinase	RT		5	3.2e-06	9e-05
	INTERPRO	Serine/threonine protein kinase, active site	RT		5	1e-05	0.00015
	INTERPRO	Serine/threonine protein kinase-related	RT		5	1.4e-05	0.00014
	GOTERM_BP_FAT	cell cycle	RT		7	1.5e-05	0.00095
	SP_PIR_KEYWORDS	transferase	RT		7	1.5e-05	0.00021
	SMART	S_TKc	RT		5	1.8e-05	9e-05
	INTERPRO	Protein kinase, ATP binding site	RT		5	1.9e-05	0.00014
	GOTERM_BP_FAT	mitotic cell cycle	RT		6	2e-05	0.001
	INTERPRO	Protein kinase, core	RT		5	3.7e-05	0.00022
	GOTERM_BP_FAT	cell cycle phase	RT		6	9.5e-05	0.0036
	GOTERM_BP_FAT	oogenesis	RT		6	0.00014	0.0046
	GOTERM_BP_FAT	female gamete generation	RT		6	0.00015	0.0044
	GOTERM_BP_FAT	cell cycle process	RT		6	0.00015	0.004
	GOTERM_BP_FAT	gamete generation	RT		6	0.00054	0.012
	GOTERM_BP_FAT	sexual reproduction	RT		6	0.00062	0.012
	GOTERM_BP_FAT	regulation of cell cycle	RT		4	0.00069	0.013
	GOTERM_BP_FAT	multicellular organism reproduction	RT		6	0.0008	0.014
	GOTERM_BP_FAT	reproductive process in a multicellular organism	RT		6	0.0008	0.014
	GOTERM_BP_FAT	cell division	RT		4	0.0013	0.021
	GOTERM_BP_FAT	cell fate commitment	RT		4	0.0018	0.028
	GOTERM_BP_FAT	asymmetric cell division	RT		3	0.0018	0.026
	SP_PIR_KEYWORDS	cell cycle	RT		3	0.0023	0.0082
	GOTERM_BP_FAT	regulation of mitotic cell cycle	RT		3	0.0051	0.068
	GOTERM_BP_FAT	reproductive cellular process	RT		4	0.016	0.18
	GOTERM_BP_FAT	reproductive developmental process	RT		4	0.016	0.18
	GOTERM_BP_FAT	instar larval or pupal development	RT		3	0.078	0.59
	GOTERM_BP_FAT	post-embryonic development	RT		3	0.083	0.6
Annotation Cluster 3		Enrichment Score: 3.59			Count	p-value	Benjamini
	GOTERM_MF_FAT	protein serine/threonine kinase activity	RT		6	2.4e-06	7.7e-05
	INTERPRO	Serine/threonine protein kinase	RT		5	2.8e-06	8.3e-05
	SP_PIR_KEYWORDS	serine/threonine-protein kinase	RT		5	3.2e-06	9e-05
	GOTERM_BP_FAT	protein amino acid phosphorylation	RT		6	4e-06	0.00035
	INTERPRO	Serine/threonine protein kinase, active site	RT		5	1e-05	0.00015
	GOTERM_MF_FAT	protein kinase activity	RT		6	1.2e-05	0.0002
	INTERPRO	Serine/threonine protein kinase-related	RT		5	1.4e-05	0.00014
	GOTERM_BP_FAT	cell cycle	RT		7	1.5e-05	0.00095
	SP_PIR_KEYWORDS	transferase	RT		7	1.5e-05	0.00021
	SMART	S_TKc	RT		5	1.8e-05	9e-05
	INTERPRO	Protein kinase, ATP binding site	RT		5	1.9e-05	0.00014
	GOTERM_BP_FAT	mitotic cell cycle	RT		6	2e-05	0.001
	INTERPRO	Protein kinase, core	RT		5	3.7e-05	0.00022
	SP_PIR_KEYWORDS	atp-binding	RT		6	3.8e-05	0.00036
	GOTERM_BP_FAT	phosphorylation	RT		6	4.5e-05	0.002
	GOTERM_BP_FAT	cell cycle phase	RT		6	9.5e-05	0.0036
	SP_PIR_KEYWORDS	nucleotide-binding	RT		6	0.00012	0.00084
	GOTERM_BP_FAT	cell cycle process	RT		6	0.00015	0.004
	GOTERM_BP_FAT	phosphorus metabolic process	RT		6	0.00016	0.0037
	GOTERM_BP_FAT	phosphate metabolic process	RT		6	0.00016	0.0037
	SP_PIR_KEYWORDS	nucleus	RT		6	0.00025	0.0012
	SP_PIR_KEYWORDS	kinase	RT		4	0.00047	0.0019
	GOTERM_MF_FAT	ATP binding	RT		6	0.0012	0.0066
	GOTERM_MF_FAT	adenyl ribonucleotide binding	RT		6	0.0013	0.0058
	GOTERM_MF_FAT	adenyl nucleotide binding	RT		6	0.0018	0.0073
	GOTERM_MF_FAT	purine nucleoside binding	RT		6	0.0019	0.0066
	GOTERM_MF_FAT	nucleoside binding	RT		6	0.0019	0.0062
	GOTERM_MF_FAT	purine ribonucleotide binding	RT		6	0.0032	0.0094
	GOTERM_MF_FAT	ribonucleotide binding	RT		6	0.0032	0.0094
	GOTERM_MF_FAT	purine nucleotide binding	RT		6	0.0044	0.012
	GOTERM_BP_FAT	cell proliferation	RT		3	0.0085	0.11
	GOTERM_MF_FAT	nucleotide binding	RT		6	0.01	0.026
	UP_SEQ_FEATURE	domain:Protein kinase	RT		3	0.015	0.28
	UP_SEQ_FEATURE	binding site:ATP	RT		3	0.022	0.22
	UP_SEQ_FEATURE	active site:Proton acceptor	RT		3	0.027	0.18
	UP_SEQ_FEATURE	nucleotide phosphate-binding region:ATP	RT		3	0.073	0.34
	GOTERM_BP_FAT	M phase	RT		3	0.098	0.65
